FALL 2018 | VOLUME 16 | NUMBER 4

# Focus

The Journal of Lifelong Learning in Psychiatry

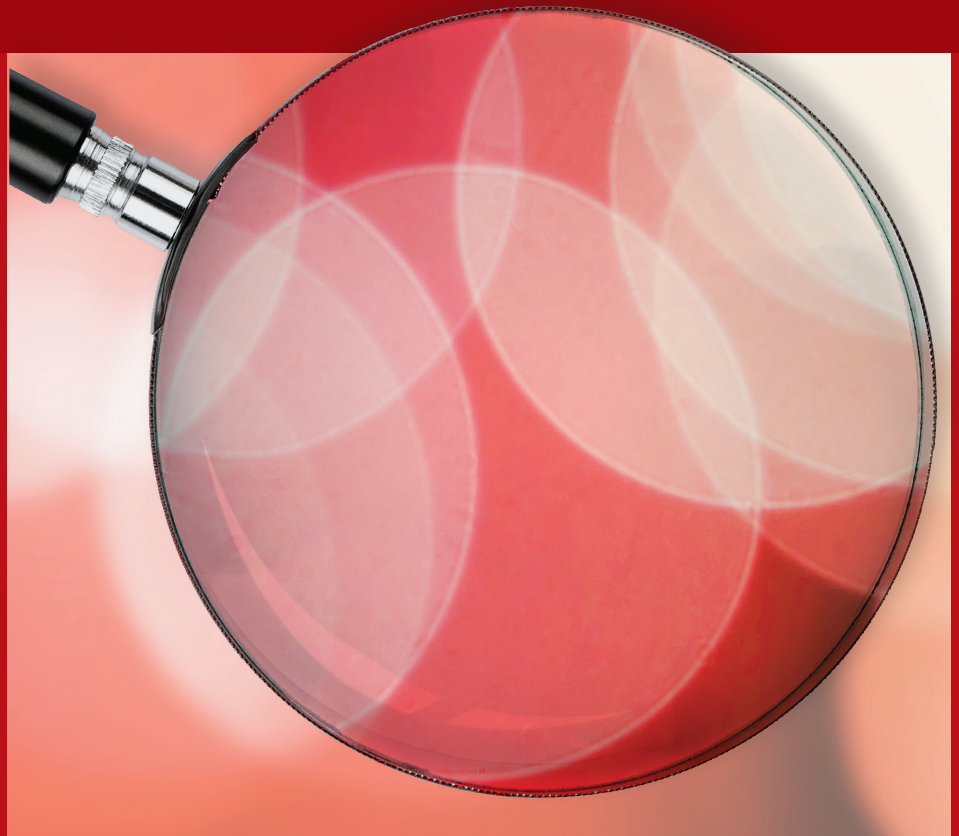

## Psychotherapy: Access to Effective Treatments

Guest Editor: Sheila A. M. Rauch, Ph.D., ABPP

AMERICAN  
PSYCHIATRIC  
ASSOCIATION

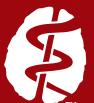

[focus.psychiatryonline.org](http://focus.psychiatryonline.org)
